# Supplementary material for: Comparative analysis of alternative polyadenylation in S. cerevisiae and S. pombe
Source: HighWire-hosted journal article supplement (doi:10.1101/gr.222331.117), 2017-09-15
Supplement: Supplemental_Fig_S1.pdf [file Supplemental_Fig_S1.pdf]

Figure S1

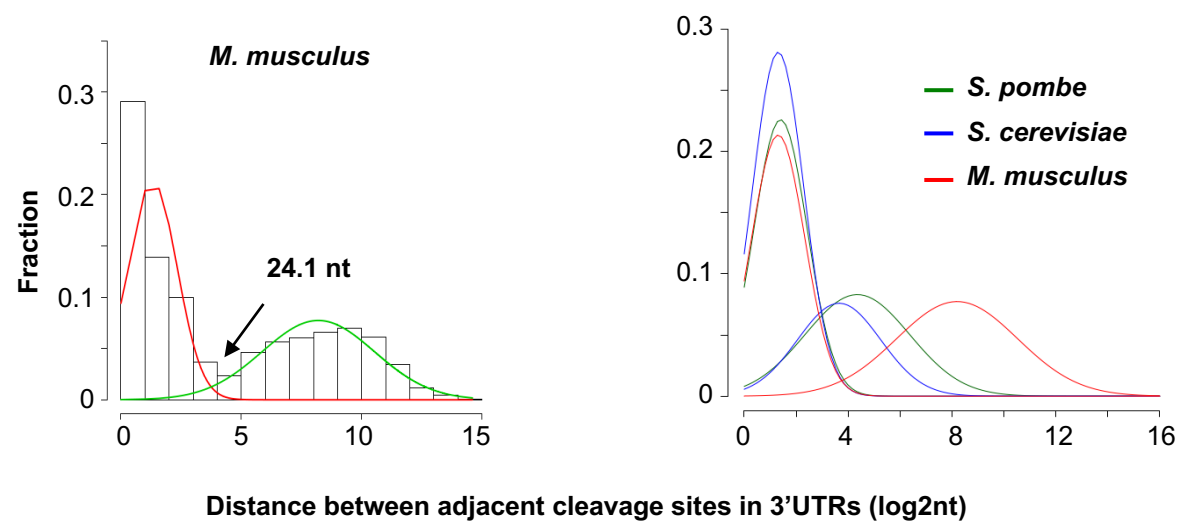

**Figure S1.** Two distribution modes were identified by using the maximum expectation method (see Methods for detail). The mouse data was used as a control to validate the method and parameters (Left). Data for three species were plotted together (Right). See figure legend of Figure 1C for detail.
