# Supplementary material for: Comparative analysis of alternative polyadenylation in S. cerevisiae and S. pombe
Source: HighWire-hosted journal article supplement (doi:10.1101/gr.222331.117), 2017-09-15
Supplement: Supplemental_Fig_S4.pdf [file Supplemental_Fig_S4.pdf]

Figure S4

A

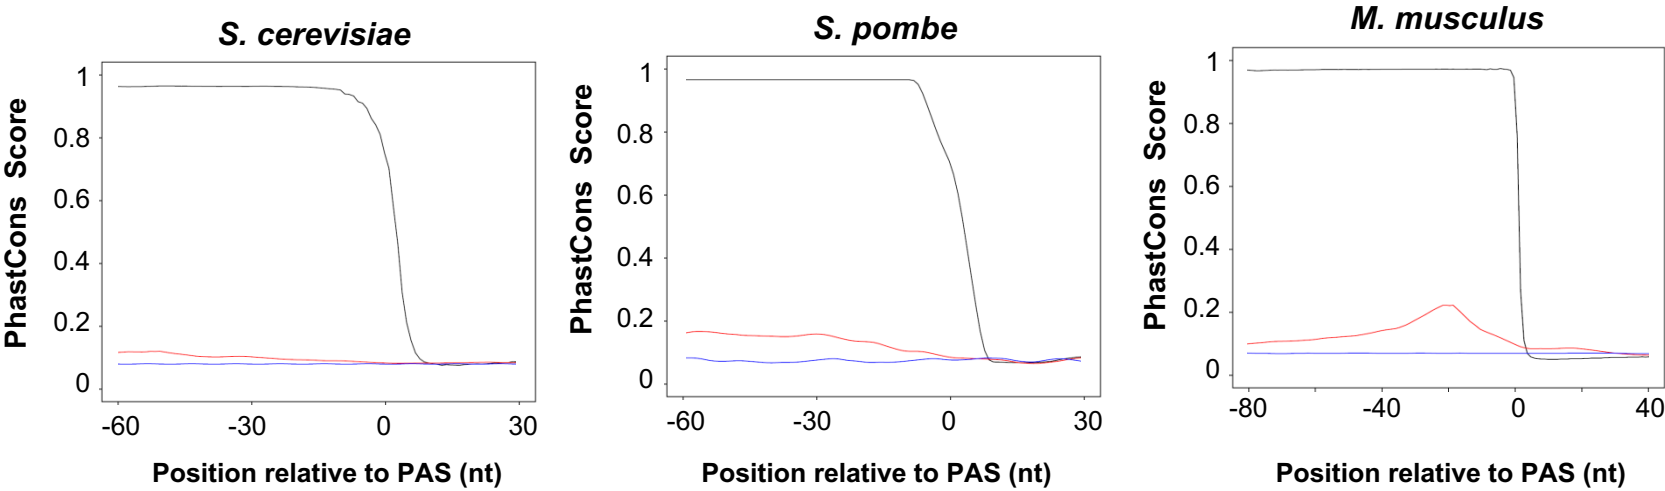

B

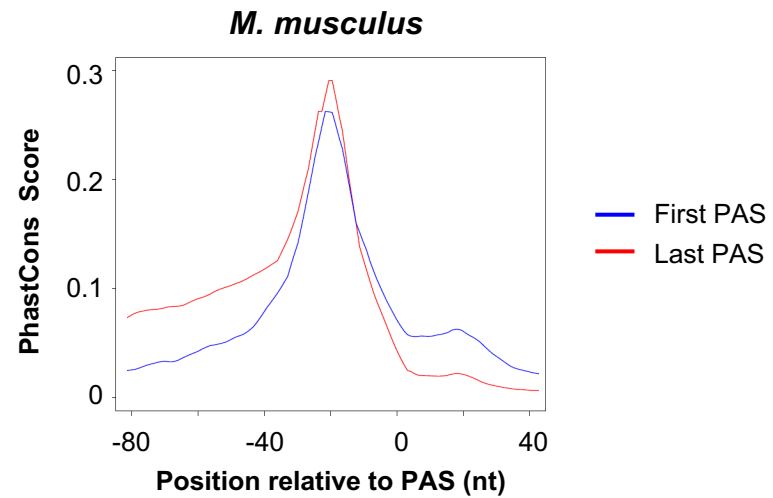

**Figure S4.** (A) PhastCons scores of the flanking regions of the stop codon and PAS as well as of intergenic regions. Stop codon and intergenic regions were used as references. (B) PhastCons scores of the flanking regions of the first and last 3'UTR PASs in mouse.
