# Supplementary material for: Comparative analysis of alternative polyadenylation in S. cerevisiae and S. pombe
Source: HighWire-hosted journal article supplement (doi:10.1101/gr.222331.117), 2017-09-15
Supplement: Supplemental_Table_S2.pdf [file Supplemental_Table_S2.pdf]

**Table S2. Top gene ontology terms associated with mouse genes that contain 3'UTR APA sites.**

|                    | Category | GO Term                                                      | $-\log_{10} P$ |
|--------------------|----------|--------------------------------------------------------------|----------------|
| <i>M. musculus</i> | BP       | cell part morphogenesis                                      | 6.5            |
|                    | BP       | protein modification by small protein conjugation or removal | 6.4            |
|                    | BP       | endosomal transport                                          | 5.4            |
|                    | CC       | microtubule organizing center                                | 7.2            |
|                    | CC       | transferase complex                                          | 7.0            |
|                    | CC       | Golgi membrane                                               | 5.4            |

GO, gene ontology; BP, biological process; CC, cellular component. P-value is based on the hypergeometric test.
