# Supplementary material for: Comparative analysis of alternative polyadenylation in S. cerevisiae and S. pombe
Source: HighWire-hosted journal article supplement (doi:10.1101/gr.222331.117), 2017-09-15
Supplement: Supplemental_Table_S3.pdf [file Supplemental_Table_S3.pdf]

**Table S3. Top gene ontology terms associated with *S. cerevisiae* genes that are up- or down-regulated in rich vs. minimal media.**

|                | Category | GO Term                                   | $-\log_{10} P$ |
|----------------|----------|-------------------------------------------|----------------|
| Up-regulated   | BP       | vacuole organization                      | 2.7            |
|                | BP       | organelle fusion                          | 2.7            |
|                | BP       | ER to Golgi vesicle-mediated transport    | 2.7            |
|                | CC       | endoplasmic reticulum                     | 5.6            |
|                | CC       | endomembrane system                       | 5.3            |
|                | CC       | integral component of membrane            | 5.0            |
| Down-regulated | BP       | carboxylic acid metabolic process         | 17.4           |
|                | BP       | small molecule metabolic process          | 13.1           |
|                | BP       | organonitrogen compound metabolic process | 12.5           |
|                | CC       | cytosol                                   | 5.6            |
|                | CC       | mitochondrion                             | 5.4            |
|                | CC       | cytoplasmic part                          | 3.9            |

GO, gene ontology; BP, biological process; CC, cellular component. P-value is based on the hypergeometric test.
