# Supplementary material for: Comparative analysis of alternative polyadenylation in S. cerevisiae and S. pombe
Source: HighWire-hosted journal article supplement (doi:10.1101/gr.222331.117), 2017-09-15
Supplement: Supplemental_Table_S4.pdf [file Supplemental_Table_S4.pdf]

**Table S4. Top gene ontology terms associated with *S. pombe* genes that are up- or down-regulated in rich vs. minimal media.**

|                | Category | GO Term                                       | $-\log_{10}P$ |
|----------------|----------|-----------------------------------------------|---------------|
| Up-regulated   | BP       | cytoplasmic translation                       | 94.9          |
|                | BP       | organic substance biosynthetic process        | 27.3          |
|                | BP       | cellular protein metabolic process            | 19.3          |
|                | CC       | cytosolic ribosome                            | 93.2          |
|                | CC       | ribosome                                      | 72.6          |
|                | CC       | ribonucleoprotein complex                     | 52.0          |
| Down-regulated | BP       | ion transport                                 | 6.8           |
|                | BP       | carbohydrate catabolic process                | 4.9           |
|                | BP       | cytokinetic cell separation                   | 4.2           |
|                | CC       | plasma membrane                               | 5.6           |
|                | CC       | cell periphery                                | 5.3           |
|                | CC       | proton-transporting two-sector ATPase complex | 4.6           |

GO, gene ontology; BP, biological process; CC, cellular component. P-value is based on the hypergeometric test.
